# Supplementary material
Source: PubMed Central journal article supplement (PMC10465068)
Supplement: NIHMS1532196-supplement-1.pdf [file NIHMS1532196-supplement-1.pdf]

**Online Figure 1. Love plot for balance in baseline characteristics**

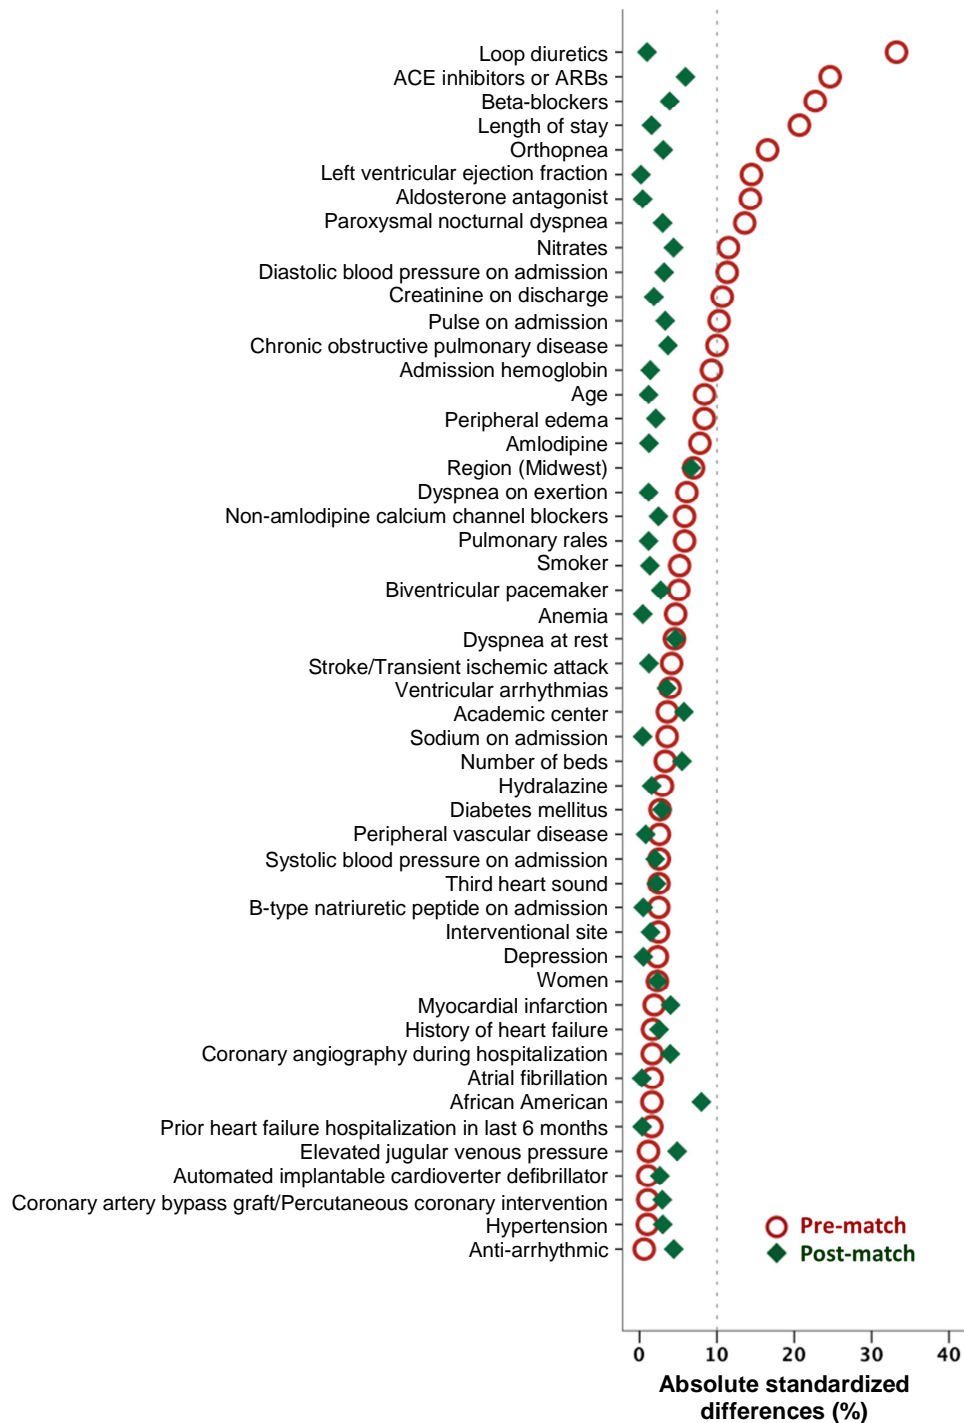

Love plot displaying absolute standardized differences comparing 50 baseline characteristics of patients with heart failure with reduced ejection fraction, by discontinuation of digoxin at discharge (ACE = angiotensin-converting enzyme, ARB = angiotensin receptor blocker)

Online Figure 2. Kaplan-Meier plot for combined endpoint by discontinuation of digoxin

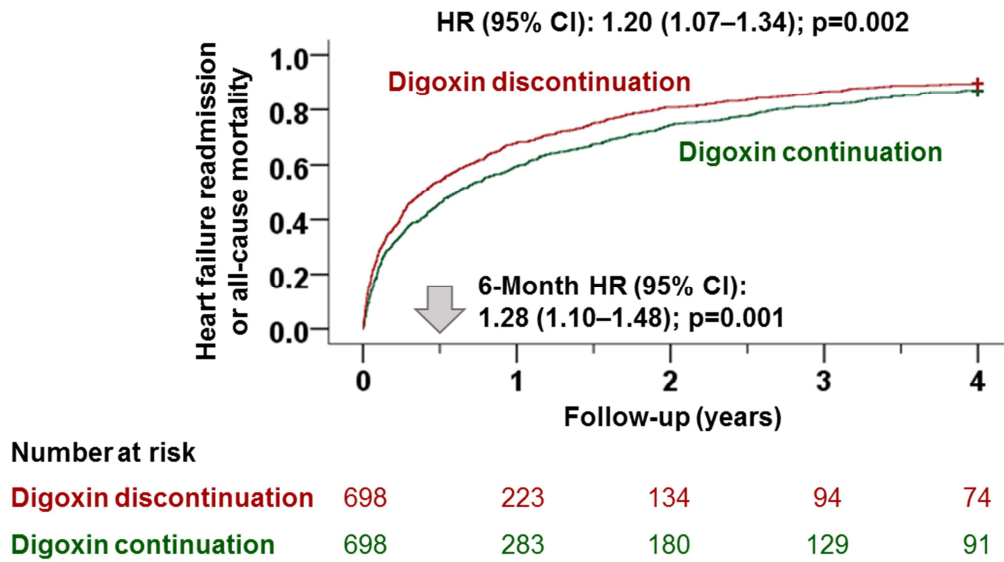

Kaplan-Meier plots for the combined endpoint of heart failure readmission or all-cause mortality at 4 years by discharge discontinuation of digoxin in 698 pairs of propensity score-matched patients with heart failure with reduced ejection fraction

**Online Table 1.** Baseline Characteristics of Hospitalized Older Patients with Heart Failure with Reduced Ejection Fraction in the Sensitivity Cohort\* by Discontinuation of Digoxin

|                                        | Before propensity score-matching<br>(n=2,971) |                |            | After propensity score-matching<br>(n=1,204) |                |            |
|----------------------------------------|-----------------------------------------------|----------------|------------|----------------------------------------------|----------------|------------|
|                                        | Digoxin discontinuation                       |                |            | Digoxin discontinuation                      |                |            |
|                                        | No<br>(n=2,349)                               | Yes<br>(n=622) | P<br>value | No<br>(n=602)                                | Yes<br>(n=602) | P<br>value |
| Age (years)                            | 75 ( $\pm$ 11)                                | 76 ( $\pm$ 11) | 0.035      | 77 ( $\pm$ 11)                               | 76 ( $\pm$ 11) | 0.765      |
| Women                                  | 923 (39%)                                     | 250 (40%)      | 0.683      | 240 (40%)                                    | 238 (40%)      | 0.906      |
| African American                       | 329 (14%)                                     | 92 (15%)       | 0.618      | 89 (15%)                                     | 87 (14%)       | 0.870      |
| Left ventricular ejection fraction (%) | 27 ( $\pm$ 9)                                 | 28 ( $\pm$ 9)  | 0.001      | 28 ( $\pm$ 9)                                | 28 ( $\pm$ 10) | 0.434      |
| Smoker in past 1 year                  | 308 (13%)                                     | 66 (11%)       | 0.095      | 62 (10%)                                     | 65 (11%)       | 0.778      |
| <b>Past medical history</b>            |                                               |                |            |                                              |                |            |
| Prior heart failure                    | 2,234 (95%)                                   | 588 (95%)      | 0.562      | 569 (95%)                                    | 568 (94%)      | 0.900      |
| Prior HF hospitalization in 6 months   | 502 (21%)                                     | 137 (22%)      | 0.724      | 125 (21%)                                    | 131 (22%)      | 0.673      |
| Hypertension                           | 1,535 (65%)                                   | 404 (65%)      | 0.854      | 404 (67%)                                    | 392 (65%)      | 0.465      |
| Myocardial infarction                  | 718 (31%)                                     | 183 (29%)      | 0.581      | 185 (31%)                                    | 179 (30%)      | 0.707      |
| Coronary revascularization             | 919 (39%)                                     | 245 (39%)      | 0.904      | 238 (40%)                                    | 240 (40%)      | 0.906      |
| Diabetes mellitus                      | 972 (41%)                                     | 262 (42%)      | 0.738      | 256 (43%)                                    | 255 (42%)      | 0.954      |
| Stroke/transient ischemic attack       | 367 (16%)                                     | 92 (15%)       | 0.609      | 80 (13%)                                     | 89 (15%)       | 0.455      |
| Peripheral vascular disease            | 389 (17%)                                     | 90 (14%)       | 0.207      | 90 (15%)                                     | 89 (15%)       | 0.935      |
| Atrial fibrillation                    | 1,091 (46%)                                   | 285 (46%)      | 0.781      | 263 (44%)                                    | 281 (47%)      | 0.297      |
| Ventricular arrhythmia                 | 237 (10%)                                     | 52 (8%)        | 0.196      | 48 (8%)                                      | 50 (8%)        | 0.833      |
| Implantable cardioverter defibrillator | 289 (12%)                                     | 69 (11%)       | 0.410      | 63 (10%)                                     | 67 (11%)       | 0.710      |
| Bi-ventricular pacemaker               | 201 (9%)                                      | 44 (7%)        | 0.232      | 41 (7%)                                      | 43 (7%)        | 0.821      |
| Chronic obstructive pulmonary disease  | 695 (30%)                                     | 155 (25%)      | 0.022      | 150 (25%)                                    | 155 (26%)      | 0.740      |
| Anemia                                 | 358 (15%)                                     | 82 (13%)       | 0.199      | 97 (16%)                                     | 81 (13%)       | 0.194      |
| Depression                             | 218 (9%)                                      | 61 (10%)       | 0.689      | 49 (8%)                                      | 55 (9%)        | 0.538      |
| <b>Admission findings</b>              |                                               |                |            |                                              |                |            |
| Dyspnea at rest                        | 1,023 (44%)                                   | 257 (41%)      | 0.318      | 234 (39%)                                    | 250 (42%)      | 0.347      |
| Dyspnea on exertion                    | 1,474 (63%)                                   | 374 (60%)      | 0.231      | 375 (62%)                                    | 362 (60%)      | 0.442      |
| Orthopnea                              | 725 (31%)                                     | 144 (23%)      | <0.001     | 144 (24%)                                    | 142 (24%)      | 0.892      |
| Paroxysmal nocturnal dyspnea           | 440 (19%)                                     | 83 (13%)       | 0.002      | 79 (13%)                                     | 83 (14%)       | 0.736      |
| Jugular venous pressure elevation      | 827 (35%)                                     | 214 (34%)      | 0.710      | 195 (32%)                                    | 209 (35%)      | 0.393      |

**Online Table 1.** Baseline Characteristics of Hospitalized Older Patients with Heart Failure with Reduced Ejection Fraction in the Sensitivity Cohort\* by Discontinuation of Digoxin

|                                                           | Before propensity score-matching<br>(n=2,971) |                         |            | After propensity score-matching<br>(n=1,204) |                         |            |
|-----------------------------------------------------------|-----------------------------------------------|-------------------------|------------|----------------------------------------------|-------------------------|------------|
|                                                           | Digoxin discontinuation                       |                         | P<br>value | Digoxin discontinuation                      |                         | P<br>value |
|                                                           | No<br>(n=2,349)                               | Yes<br>(n=622)          |            | No<br>(n=602)                                | Yes<br>(n=602)          |            |
| Third heart sound                                         | 314 (13%)                                     | 80 (13%)                | 0.741      | 76 (13%)                                     | 74 (12%)                | 0.861      |
| Pulmonary rales                                           | 1,469 (63%)                                   | 363 (58%)               | 0.057      | 339 (56%)                                    | 353 (59%)               | 0.414      |
| Peripheral edema                                          | 1,467 (62%)                                   | 409 (66%)               | 0.129      | 378 (63%)                                    | 398 (66%)               | 0.229      |
| Pulse (beats per minute)                                  | 85 ( $\pm$ 20)                                | 83 ( $\pm$ 20)          | 0.011      | 83 ( $\pm$ 20)                               | 83 ( $\pm$ 20)          | 0.812      |
| Systolic blood pressure<br>(mmHg)                         | 133 ( $\pm$ 28)                               | 134 ( $\pm$ 30)         | 0.466      | 135 ( $\pm$ 29)                              | 134 ( $\pm$ 30)         | 0.503      |
| Diastolic blood pressure<br>(mmHg)                        | 74 ( $\pm$ 18)                                | 71 ( $\pm$ 18)          | 0.002      | 71 ( $\pm$ 17)                               | 72 ( $\pm$ 18)          | 0.711      |
| <b>Laboratory findings</b>                                |                                               |                         |            |                                              |                         |            |
| Admission serum sodium<br>(mEq/L)                         | 137 ( $\pm$ 9)                                | 136 ( $\pm$ 13)         | 0.092      | 136 ( $\pm$ 11)                              | 136 ( $\pm$ 13)         | 0.810      |
| Admission hemoglobin<br>(g/dL)                            | 12 ( $\pm$ 3)                                 | 12 ( $\pm$ 2)           | 0.026      | 12 ( $\pm$ 2)                                | 12 ( $\pm$ 2)           | 0.532      |
| Admission serum BNP<br>(pg/mL)                            | 1,407<br>( $\pm$ 1,148)                       | 1,444<br>( $\pm$ 1,086) | 0.472      | 1,364<br>( $\pm$ 1,075)                      | 1,433<br>( $\pm$ 1,071) | 0.265      |
| Admission creatinine<br>(mg/dL)                           | 1.6 ( $\pm$ 1.0)                              | 1.7 ( $\pm$ 1.2)        | 0.004      | 1.7 ( $\pm$ 1.3)                             | 1.7 ( $\pm$ 1.1)        | 0.901      |
| Discharge creatinine<br>(mg/dL)                           | 1.6 ( $\pm$ 0.9)                              | 1.7 ( $\pm$ 1.0)        | 0.006      | 1.6 ( $\pm$ 1.0)                             | 1.7 ( $\pm$ 0.9)        | 0.708      |
| Admission-to-discharge<br>change in creatinine            | -0.04<br>( $\pm$ 0.6)                         | -0.06<br>( $\pm$ 0.9)   | 0.408      | -0.08<br>( $\pm$ 0.8)                        | -0.07<br>( $\pm$ 0.9)   | 0.800      |
| Admission-to-discharge<br>creatinine rise $\geq$ 0.3mg/dL | 330 (14%)                                     | 88 (14%)                | 0.949      | 77 (13%)                                     | 85 (14%)                | 0.499      |
| <b>Discharge medications</b>                              |                                               |                         |            |                                              |                         |            |
| ACE inhibitors or ARBs                                    | 1,679 (71%)                                   | 383 (62%)               | <0.001     | 374 (62%)                                    | 377 (63%)               | 0.858      |
| Beta-blockers                                             | 1,718 (73%)                                   | 395 (64%)               | <0.001     | 398 (66%)                                    | 390 (65%)               | 0.628      |
| Aldosterone antagonists                                   | 480 (20%)                                     | 89 (14%)                | 0.001      | 81 (13%)                                     | 89 (15%)                | 0.508      |
| Loop diuretics                                            | 2,004 (85%)                                   | 456 (73%)               | <0.001     | 447 (74%)                                    | 451 (75%)               | 0.791      |
| Hydralazine                                               | 96 (4%)                                       | 22 (4%)                 | 0.532      | 24 (4%)                                      | 21 (3%)                 | 0.649      |
| Nitrates                                                  | 679 (29%)                                     | 154 (25%)               | 0.041      | 155 (26%)                                    | 152 (25%)               | 0.843      |
| Amlodipine                                                | 96 (4%)                                       | 37 (6%)                 | 0.046      | 35 (6%)                                      | 35 (6%)                 | 1.000      |
| Other calcium channel<br>blockers                         | 159 (7%)                                      | 39 (6%)                 | 0.657      | 47 (8%)                                      | 37 (6%)                 | 0.258      |
| Anti-arrhythmics                                          | 414 (18%)                                     | 119 (19%)               | 0.384      | 119 (20%)                                    | 118 (20%)               | 0.942      |
| Coronary angiography                                      | 199 (8%)                                      | 50 (8%)                 | 0.729      | 51 (8%)                                      | 49 (8%)                 | 0.835      |

**Online Table 1.** Baseline Characteristics of Hospitalized Older Patients with Heart Failure with Reduced Ejection Fraction in the Sensitivity Cohort\* by Discontinuation of Digoxin

|                                   | Before propensity score-matching<br>(n=2,971) |                     |            | After propensity score-matching<br>(n=1,204) |                     |            |
|-----------------------------------|-----------------------------------------------|---------------------|------------|----------------------------------------------|---------------------|------------|
|                                   | Digoxin discontinuation                       |                     | P<br>value | Digoxin discontinuation                      |                     | P<br>value |
|                                   | No<br>(n=2,349)                               | Yes<br>(n=622)      |            | No<br>(n=602)                                | Yes<br>(n=602)      |            |
| Hospital length of stay<br>(days) | 5.6 ( $\pm$ 5.1)                              | 7.0 ( $\pm$ 8.3)    | <0.001     | 6.5 ( $\pm$ 6.9)                             | 6.5 ( $\pm$ 5.6)    | 0.993      |
| Hospital characteristics          |                                               |                     |            |                                              |                     |            |
| Region                            |                                               |                     | 0.009      |                                              |                     | 0.946      |
| Midwest                           | 779 (33%)                                     | 199 (32%)           |            | 190 (32%)                                    | 192 (32%)           |            |
| Northeast                         | 385 (16%)                                     | 76 (12%)            |            | 77 (13%)                                     | 76 (13%)            |            |
| South                             | 800 (34%)                                     | 217 (35%)           |            | 218 (36%)                                    | 210 (35%)           |            |
| West                              | 385 (16%)                                     | 130 (21%)           |            | 117 (19%)                                    | 124 (21%)           |            |
| Size (number of beds)             | 415 ( $\pm$ 236)                              | 415<br>( $\pm$ 233) | 0.947      | 413 ( $\pm$ 233)                             | 417<br>( $\pm$ 234) | 0.769      |
| Interventional center             | 1,868 (80%)                                   | 499 (80%)           | 0.699      | 486 (81%)                                    | 484 (80%)           | 0.884      |
| Academic center                   | 1,168 (50%)                                   | 298 (48%)           | 0.421      | 292 (49%)                                    | 288 (48%)           | 0.818      |

\*The sensitivity cohort was also accounted for admission and discharge serum creatinine, and incident acute kidney injury during hospital stay, all of which were balanced after matching. Values are n (%) or mean  $\pm$  standard deviation; p values comparing medians are based on nonparametric independent sample median test.

ACE = angiotensin-converting enzyme; ARB = angiotensin receptor blocker; BNP = B-type natriuretic peptide; HF = heart failure

**Online Table 2.** Outcomes in 1,204 Propensity Score-Matched Hospitalized Patients with Heart Failure (HF) with Reduced Ejection Fraction in the Sensitivity Cohort\* by Digoxin Discontinuation at Hospital Discharge

|                                       | Events (%) for digoxin discontinuation at hospital discharge |             | Hazard ratio associated with digoxin discontinuation (95% CI); p value |
|---------------------------------------|--------------------------------------------------------------|-------------|------------------------------------------------------------------------|
|                                       | No (n=602)                                                   | Yes (n=602) |                                                                        |
| <u>30-day outcomes</u>                |                                                              |             |                                                                        |
| HF readmission                        | 67 (11%)                                                     | 93 (15%)    | 1.45 (1.06–1.99); p=0.020                                              |
| All-cause readmission                 | 162 (27%)                                                    | 173 (29%)   | 1.11 (0.90–1.38); p=0.326                                              |
| All-cause mortality                   | 39 (6%)                                                      | 66 (11%)    | 1.73 (1.17–2.57); p=0.007                                              |
| HF readmission or all-cause mortality | 102 (17%)                                                    | 148 (25%)   | 1.51 (1.17–1.94); p=0.001                                              |
| <u>6-month outcomes</u>               |                                                              |             |                                                                        |
| HF readmission                        | 188 (31%)                                                    | 220 (37%)   | 1.30 (1.07–1.57); p=0.009                                              |
| All-cause readmission                 | 341 (57%)                                                    | 358 (59%)   | 1.15 (0.99–1.34); p=0.063                                              |
| All-cause mortality                   | 144 (24%)                                                    | 186 (31%)   | 1.36 (1.10–1.70); p=0.005                                              |
| HF readmission or all-cause mortality | 279 (46%)                                                    | 330 (55%)   | 1.30 (1.11–1.53); p=0.001                                              |
| <u>1-year outcomes</u>                |                                                              |             |                                                                        |
| HF readmission                        | 241 (40%)                                                    | 278 (46%)   | 1.31 (1.10–1.56); p=0.002                                              |
| All-cause readmission                 | 417 (69%)                                                    | 423 (70%)   | 1.14 (1.00–1.31); p=0.052                                              |
| All-cause mortality                   | 213 (35%)                                                    | 253 (42%)   | 1.27 (1.06–1.53); p=0.010                                              |
| HF readmission or all-cause mortality | 356 (59%)                                                    | 413 (69%)   | 1.31 (1.14–1.51); p<0.001                                              |
| <u>4-year outcomes</u>                |                                                              |             |                                                                        |
| HF readmission                        | 336 (56%)                                                    | 355 (59%)   | 1.26 (1.08–1.46); p=0.003                                              |
| All-cause readmission                 | 517 (86%)                                                    | 505 (84%)   | 1.15 (1.02–1.30); p=0.026                                              |
| All-cause mortality                   | 438 (73%)                                                    | 449 (75%)   | 1.12 (0.98–1.28); p=0.098                                              |
| HF readmission or all-cause mortality | 530 (88%)                                                    | 543 (90%)   | 1.22 (1.08–1.38); p=0.001                                              |

\*The sensitivity cohort was also accounted for admission and discharge serum creatinine, and incident acute kidney injury during hospital stay, all of which were balanced after matching.
